# Supplementary material for: Cobalt coordination polymers regulated by in situ ligand transformation
Source: Royal Society of Chemistry journal article supplement (doi:10.1039/c6ce00104a), 2016-01-01
Supplement: c6ce00104a1.pdf [file c6ce00104a1.pdf]

## Supporting Information

for

### **Cobalt coordination polymers regulated by *in situ* ligand transformation**

Tao Huang,<sup>a,b</sup> Yu-Ling Wang,<sup>a,\*</sup> Qi Yin,<sup>b</sup> Bahar Karadeniz,<sup>b</sup> Hong-Fang Li,<sup>b</sup> Jian Lü<sup>b,\*</sup> and Rong Cao<sup>b</sup>

<sup>a</sup>*College of Chemistry and Chemical Engineering, Jiangxi Normal University, Nanchang 330022 Jiangxi, P.R. China;* <sup>b</sup>*State Key Laboratory of Structural Chemistry, Fujian Institute of Research on the Structure of Matter, Chinese Academy of Sciences, Fuzhou 350002 Fujian, P.R. China.*

**Table S1** Selected bond lengths (Å) for compounds **1-3**.

| <b>Compound 1</b>     |          |                       |          |
|-----------------------|----------|-----------------------|----------|
| Co1-O16 <sup>1</sup>  | 2.090(2) | Co1-O16               | 2.090(2) |
| Co1-O33               | 2.089(2) | Co1-O33 <sup>1</sup>  | 2.089(2) |
| Co1-N1 <sup>2</sup>   | 2.182(3) | Co1-N1 <sup>3</sup>   | 2.182(3) |
| <b>Compound 2</b>     |          |                       |          |
| Co1-O3 <sup>1</sup>   | 2.109(1) | Co1-O3                | 2.109(4) |
| Co1-N4 <sup>1</sup>   | 2.157(2) | Co1-N4                | 2.157(2) |
| Co1-O1 <sup>2</sup>   | 2.066(2) | Co1-O1 <sup>3</sup>   | 2.066(2) |
| <b>Compound 3</b>     |          |                       |          |
| Co1-O0AA              | 2.091(1) | Co1-O0AA <sup>1</sup> | 2.091(1) |
| Co1-O1 <sup>2</sup>   | 2.169(2) | Co1-O1 <sup>3</sup>   | 2.169(2) |
| Co1-O2AA              | 2.093(1) | Co1-O2AA <sup>1</sup> | 2.093(1) |
| Co2-N7                | 2.248(2) | Co2-O2 <sup>4</sup>   | 2.051(2) |
| Co2-O1AA <sup>5</sup> | 2.062(2) | Co2-O2AA <sup>5</sup> | 2.127(1) |
| Co2 O2AA              | 2.097(2) | Co2-O3AA              | 2.108(2) |

Symmetry codes for **1**: <sup>1</sup>1-X,1-Y,1-Z; <sup>2</sup>1-X,1+Y,3/2-Z; <sup>3</sup>+X,-Y,-1/2+Z; for **2**: <sup>1</sup>-X,-Y,-Z; <sup>2</sup>-1+X,1+Y,+Z; <sup>3</sup>1-X,-1-Y,-Z; for **3**: <sup>1</sup>2-X,1-Y,-Z; <sup>2</sup>+X,+Y,-1+Z; <sup>3</sup>2-X,1-Y,1-Z; <sup>4</sup>1-X,1-Y,1-Z; <sup>5</sup>1-X,1-Y,-Z.

**Table S2.** Selected hydrogen bond lengths (Å) in compounds **1** and **2**.

| <b>Compound 1</b> |          |                    |                      |
|-------------------|----------|--------------------|----------------------|
| O-H···O           | 2.663(1) | N-H···O<br>O-H···N | 2.789(2)<br>2.849(2) |
|                   | 2.742(1) |                    |                      |
|                   | 2.788(2) |                    |                      |
|                   | 2.792(1) |                    |                      |
|                   | 2.845(2) |                    |                      |
| <b>Compound 2</b> |          |                    |                      |
| O-H···O           | 2.684(1) | O-H···N            | 3.825(2)             |
|                   | 2.721(1) |                    |                      |

## Figure Captions

**Fig. S1.**  $^1\text{H}$  NMR of **HL**<sub>1a</sub>.

**Fig. S2.** View of the hydrogen-bonded structural motifs in compounds **1** (a) and **2** (b).

**Fig. S3.** A view of the 3D packing structure of compound **1**.

**Fig. S4.** A view of the 3D packing structure of compound **2**.

**Fig. S5.** Coordination modes for the organic ligand in compound **1-3**.

**Fig. S6.** Experimental and simulated PXRD patterns of compound **1**.

**Fig. S7.** Experimental and simulated PXRD patterns of compound **2**.

**Fig. S8.** CV curves for **HL**<sub>1</sub> in acetonitrile.

**Fig. S9.** Experimental and simulated PXRD patterns of compound **3**.

**Fig. S10.** TG curves of compounds **1-3**.

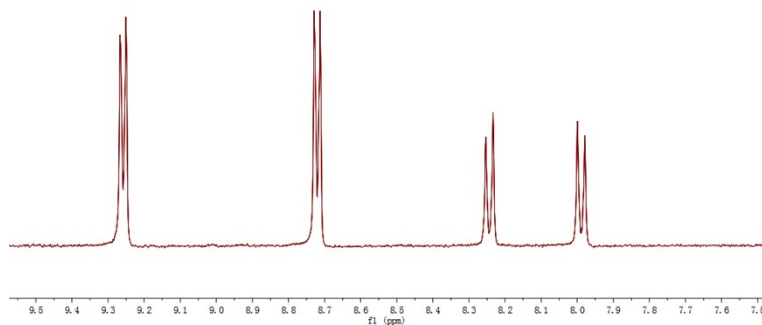

**Fig. S1**  $^1\text{H}$  NMR of **HL**<sub>1a</sub> (dissolved in 20  $\mu\text{L}$  of DCl (35 wt% in  $\text{D}_2\text{O}$ ),  $\text{DMSO-}d^6$ ): 9.26 (*d*,  $J = 6.6$  Hz, 4H, Py-H), 8.72 (*d*,  $J = 6.7$  Hz, 4H, Py-H), 8.24 (*d*,  $J = 8.1$  Hz, 2H, Ar-H), 7.99 (*d*,  $J = 8.2$  Hz, 2H, Ar-H)

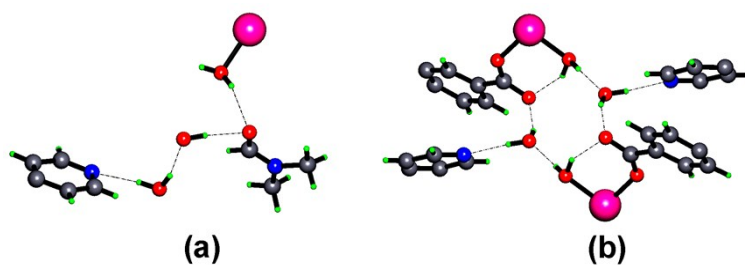

**Fig. S2**

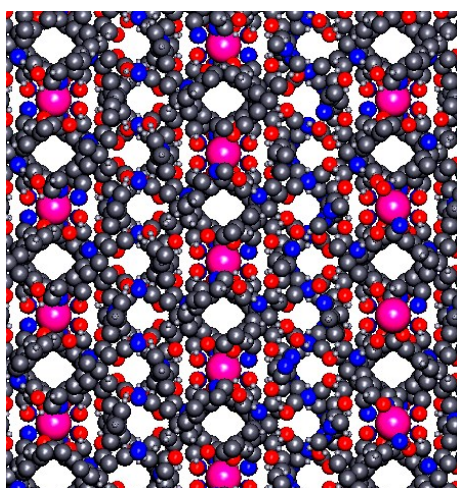

**Fig. S3**

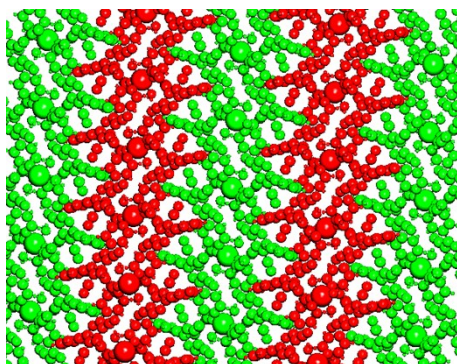

**Fig. S4**

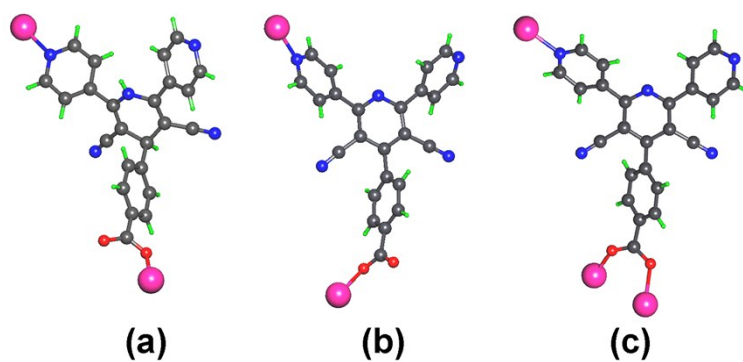

**Fig. S5**

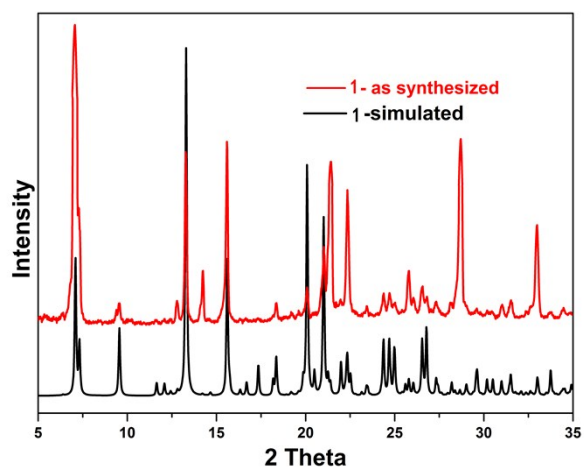

**Fig. S6**

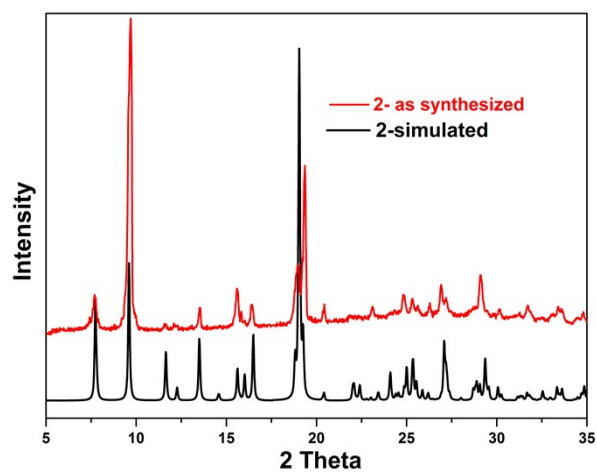

Fig. S7

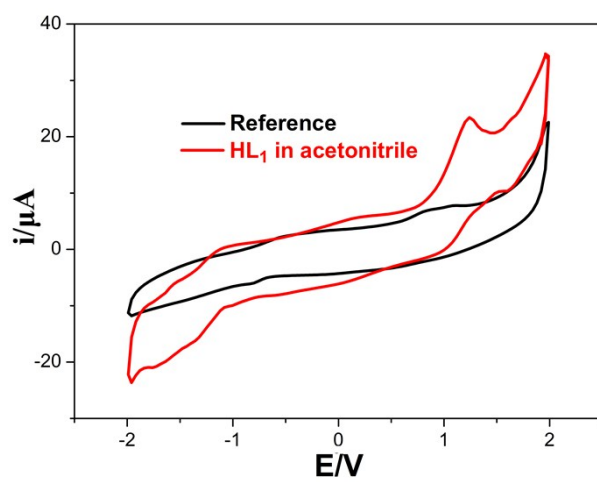

Fig. S8

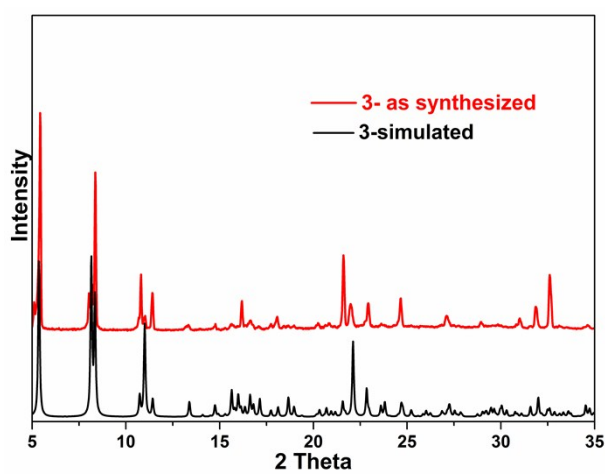

Fig. S9

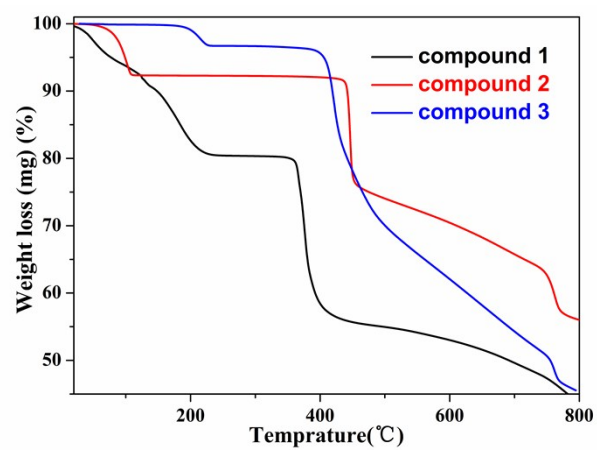

**Fig. S10**
